# Supplementary material
Source: Springer Nature journal article supplement (https://www.springermedizin.de/resource/supplementary/12911_2013_788_MOESM1_ESM.pdf/9526650)
Supplement: MOESM1 [file 9526650]

**Additional file 1. Overview of content analysis on codes, subcategories and categories.**

| <b>Code</b>                                          | <b>Subcategory</b>           | <b>Category</b>              |
|------------------------------------------------------|------------------------------|------------------------------|
| - Adapted PA                                         | Movies and pictures          | INFORMATION AND INSTRUCTIONS |
| - Exercises and equipment                            |                              |                              |
| - A typical person with RA or a brisk healthy person |                              |                              |
| - Personal, inspiring stories                        |                              |                              |
| - Ask a physical therapist or a physician            | Advice                       |                              |
| - Training styles and trends                         | News on exercises in general |                              |
| - Medication and potential side-effects              | Medication                   |                              |
| - Web-links to organizations and fitness-centers     | Survey available resources   |                              |
| - Information from peers                             |                              |                              |
| - Web-links to PA web-sites                          |                              |                              |

Note: PA=Physical activity, RA=Rheumatoid arthritis, FGI=Focus group Interview, (number)=the participant

**Additional file 1 cont.**

| <b>Code</b>                                | <b>Subcategory</b>          | <b>Category</b>       |                    |
|--------------------------------------------|-----------------------------|-----------------------|--------------------|
| - Monitor performance and progression      | Planning and monitoring     | SELF-REGULATION TOOLS |                    |
| - Electronic exercise diary                |                             |                       |                    |
| - Diagrams on performed PA                 |                             |                       |                    |
| - A web-based contract                     |                             |                       |                    |
| - Written instructions or a movie          | Performance tests           |                       |                    |
| - Personalized                             | Rewards                     |                       |                    |
| - Learn how                                |                             |                       |                    |
| - Collect small tokens                     |                             |                       |                    |
| - Special visual or audio effects          |                             |                       |                    |
| - Collect pieces of a jigsaw puzzle        |                             |                       |                    |
| - A raffle                                 |                             |                       |                    |
| - On computer or mobile phone              | Cues for action             |                       |                    |
| - Chat groups                              | Share experiences and ideas |                       | SOCIAL INTERACTION |
| - Tips on good exercises                   |                             |                       |                    |
| - Find exercise facilities and groups      |                             |                       |                    |
| - Handle side-effects of medication        |                             |                       |                    |
| - Find exercise peers                      | Contact with peers          |                       |                    |
| - Form exercise groups                     |                             |                       |                    |
| - Advertise and schedule planned exercises |                             |                       |                    |
| - A notice board to borrow a dog           |                             | Dog agency            |                    |

Note: PA=Physical activity, RA=Rheumatoid arthritis, FGI=Focus group Interview, (number)=the participant

**Additional file 1 cont.**

| <b>Code</b>                                 | <b>Subcategory</b>     | <b>Category</b>               |
|---------------------------------------------|------------------------|-------------------------------|
| - Information or interaction                | Flexible in use        | PERSONALIZED SET-UPS          |
| - Personal- web-profile                     |                        |                               |
| - Music play-lists                          |                        |                               |
| - Links to Google calendar or Facebook      | Links to applications  |                               |
| - A smart-phone application                 |                        |                               |
| - No pointers or boring articles            | Enjoyable and inviting | ATTRACTIVE DESIGN AND CONTENT |
| - Bright colors and pictures                |                        |                               |
| - Display surprises                         |                        |                               |
| - Advertisements                            | Information            |                               |
| - Information brochures                     |                        |                               |
| - Primary health care or hospital staff     | Personal introduction  |                               |
| - Postoperative rehabilitation              |                        |                               |
| - At time of diagnosis                      |                        |                               |
| - Sign up on the first page of the web-site |                        |                               |

Note: PA=Physical activity, RA=Rheumatoid arthritis, FGI=Focus group Interview, (number)=the participant
